# Supplementary material
Source: PubMed Central journal article supplement (PMC2757974)
Supplement: supp_M109.035782_jbc.M109.035782-1.pdf [file supp_M109.035782_jbc.M109.035782-1.pdf]

### **Supplemental Figure Legends:**

**Supplementary Figure 1.** LTQ Orbitrap MS3 spectrum of the MH-H<sub>3</sub>PO<sub>4</sub> doubly charged 703.2 ion. The MH ion was observed at 752.36 with Ser<sup>921</sup> phosphorylated. The peptide spanning residues 917 to 930 was isolated from a chymotryptic digest following TiO<sub>2</sub> enrichment.

**Supplementary Figure 2.** LTQ Orbitrap MS/MS spectrum of the MH doubly charged 1047.4 ion. The peptide spanning residues 954 to 971 was isolated from an endopeptidase Lys C digest following TiO<sub>2</sub> enrichment. Ser<sup>961</sup> was phosphorylated.

**Supplementary Figure 3.** LTQ Orbitrap MS/MS spectrum of the MH triply charged 545.56 ion. The peptide spanning residues 940 to 953 was isolated from an endopeptidase Lys C digest following TiO<sub>2</sub> enrichment. Ser<sup>949</sup> was phosphorylated. Spectra insets contain the indicated expanded mass region.

**Supplementary Figure 4.** LTQ Orbitrap MS/MS spectrum of the MH doubly charged 857.82 ion. The peptide spanning residues 940 to 953 was isolated from an endopeptidase Lys C digest following TiO<sub>2</sub> enrichment. Both sites Ser<sup>946</sup> and Ser<sup>949</sup> were phosphorylated. Spectra insets contain the indicated expanded mass region.

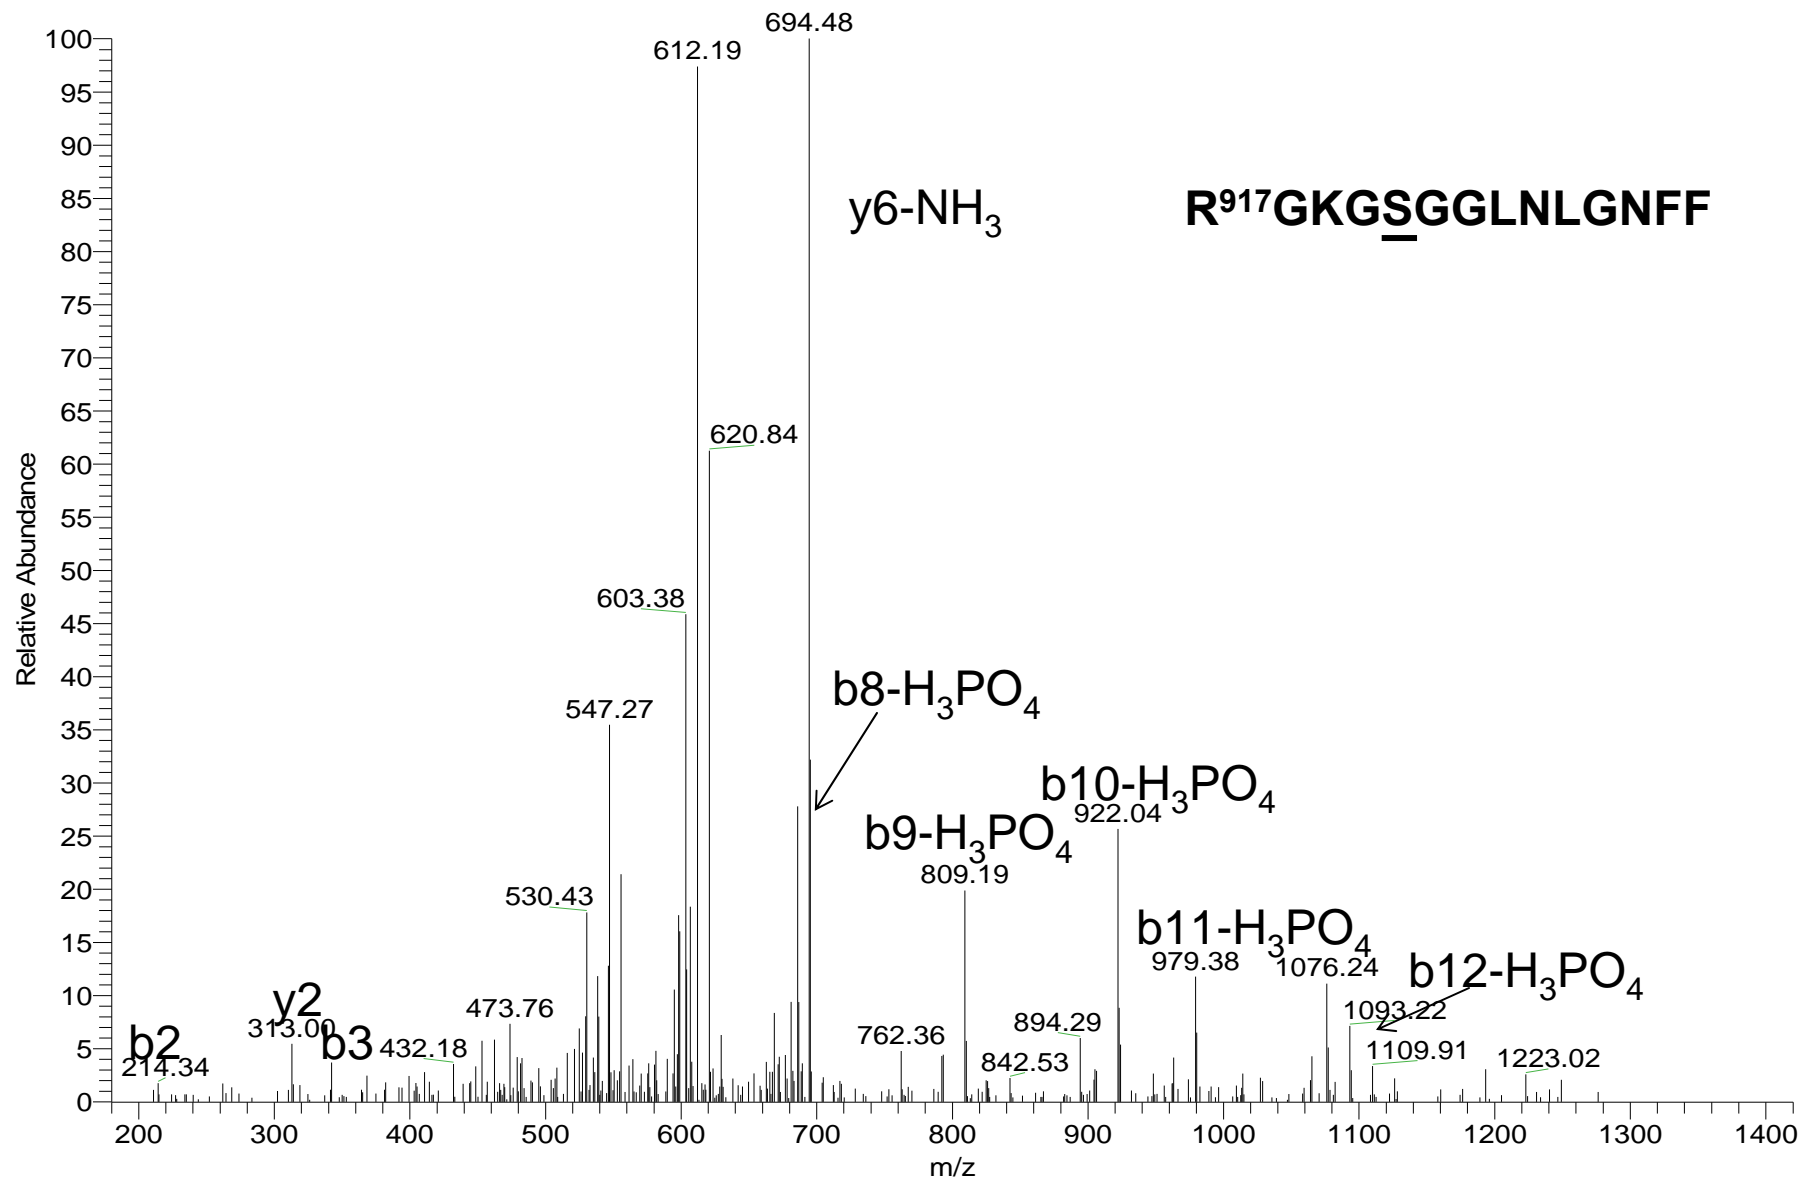

Fig.Sup\_1

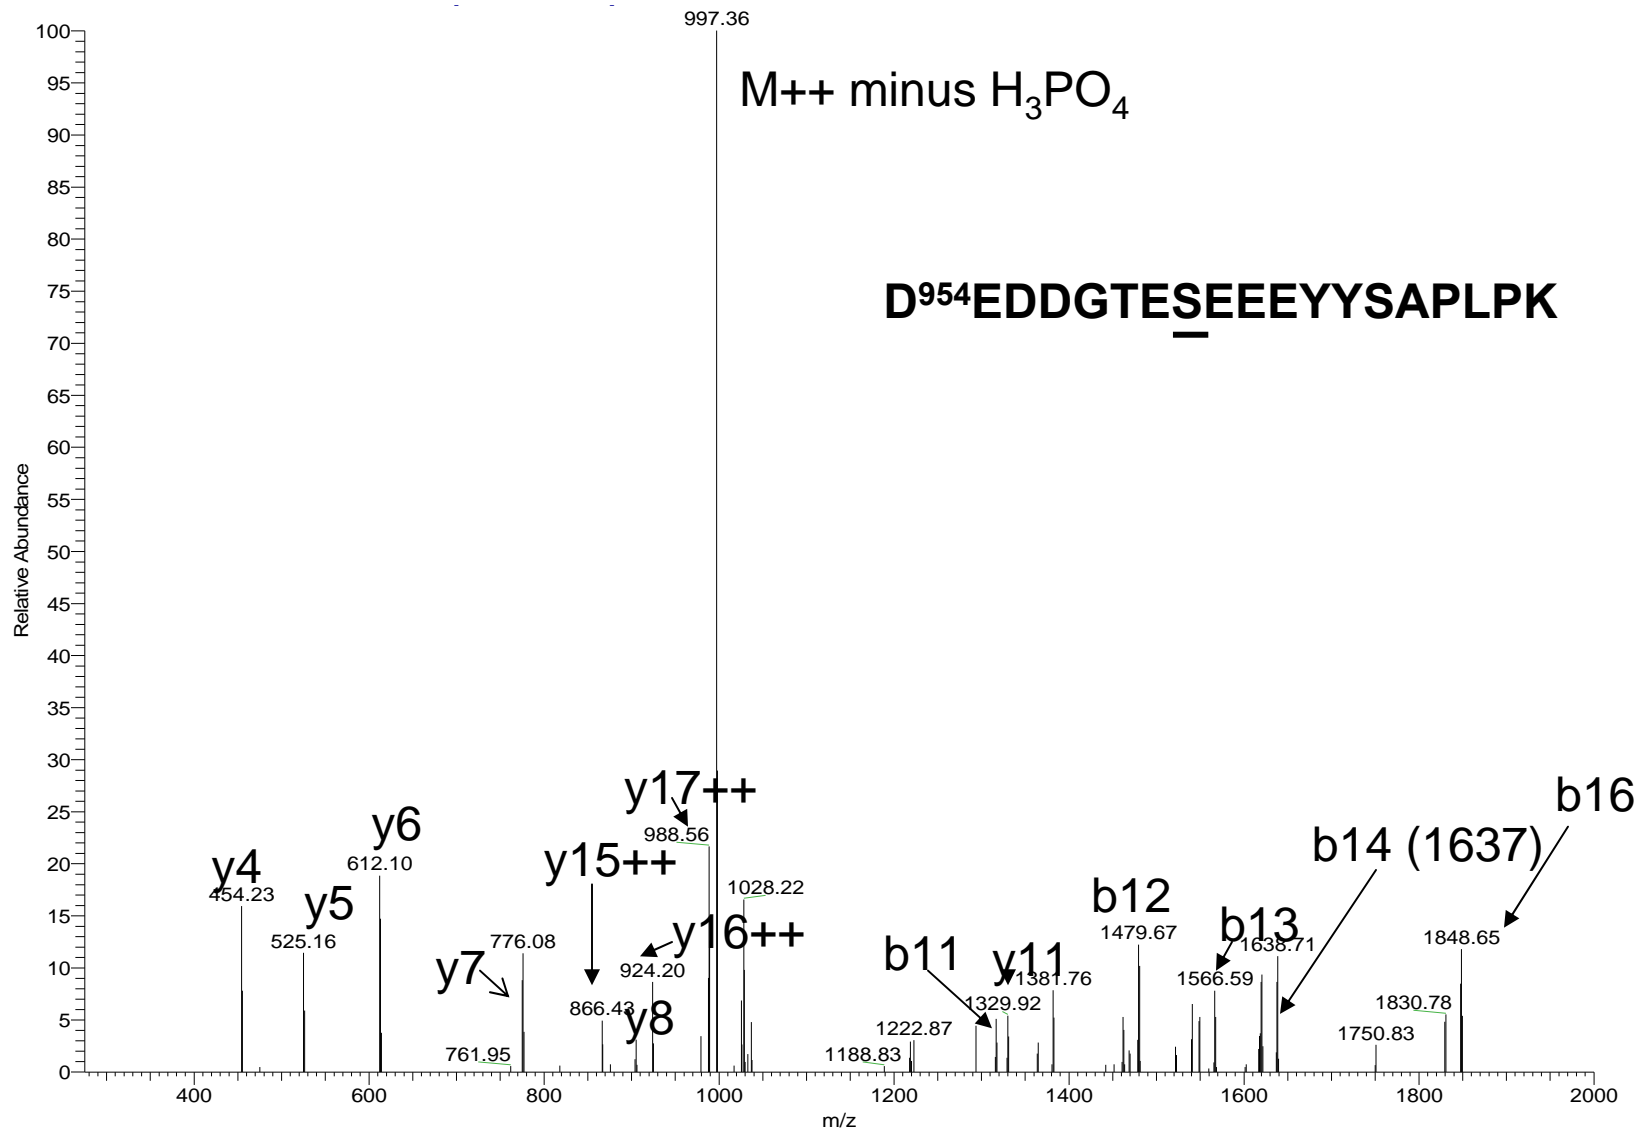

**Fig.Sup\_2**

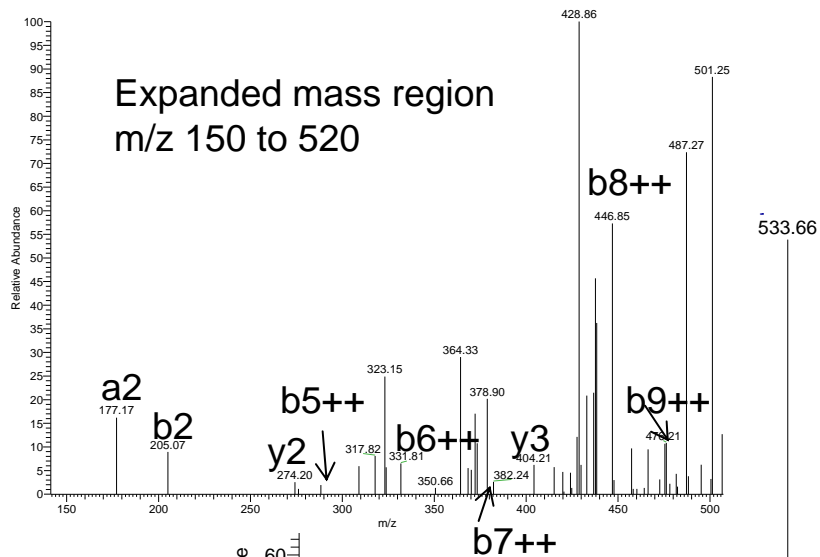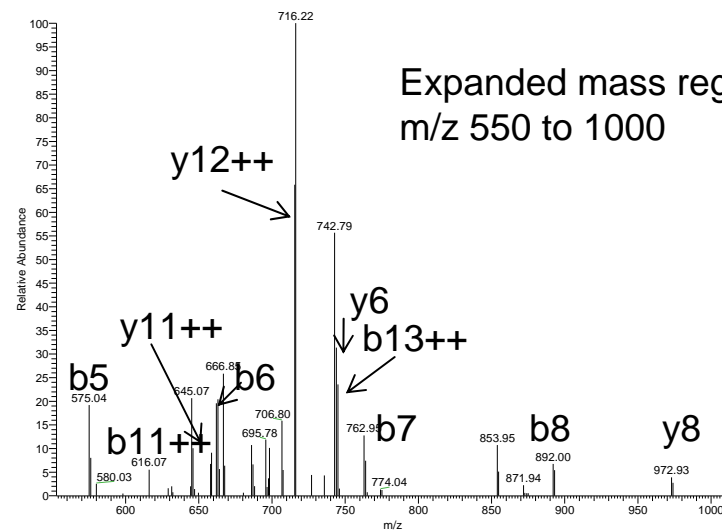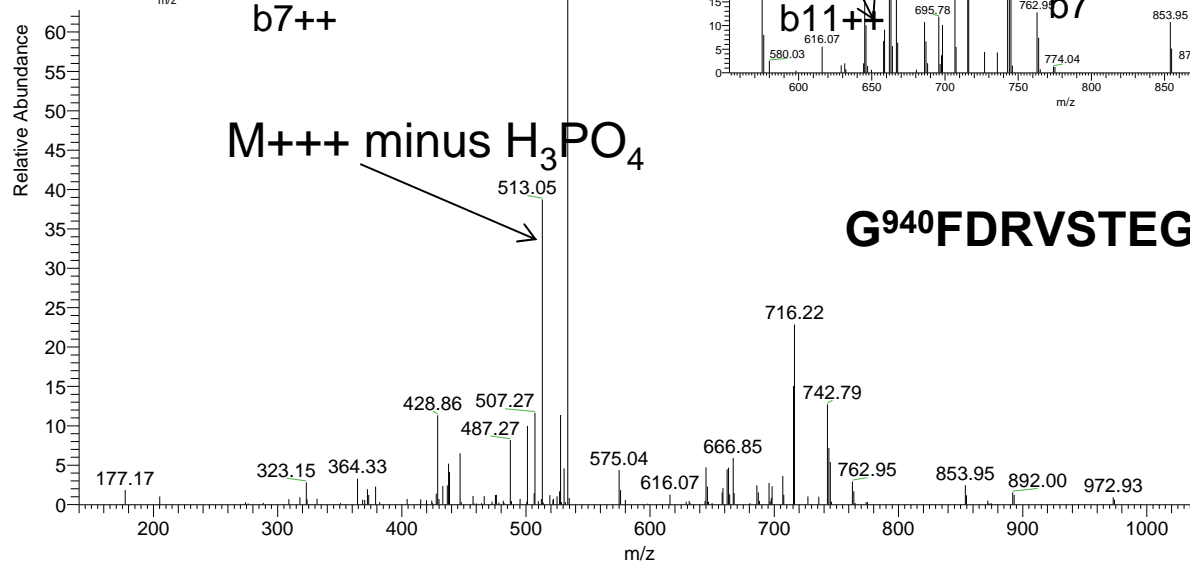

**G<sup>940</sup>FDRVSTEGSDQEK**

Fig.Sup\_3

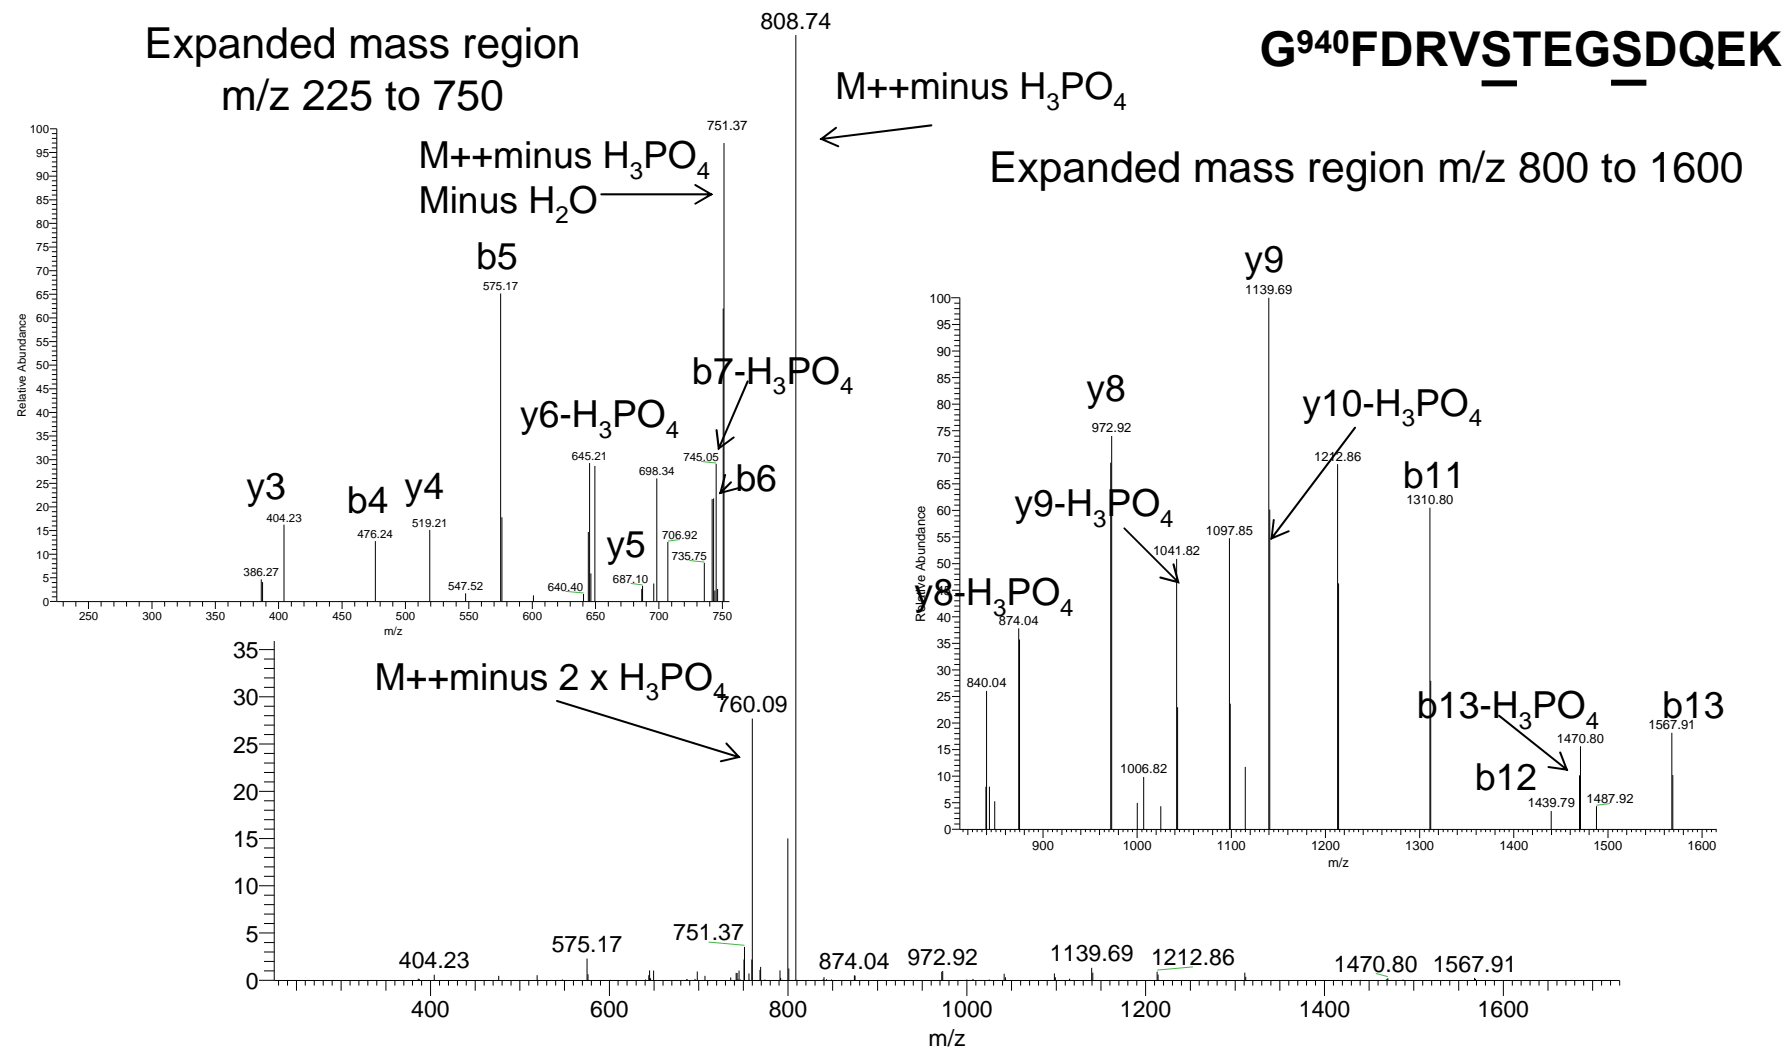

**Fig.Sup\_4**
